# Supplementary figures and images for: Bipolarsterol A, a steroid with an unprecedented 6/5/6/5 carbon skeleton from the phytopathogenic fungus Bipolaris oryzae
Source: Royal Society of Chemistry journal article supplement (doi:10.1039/d4qo02057j), 2024-12-18

iNOS

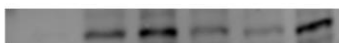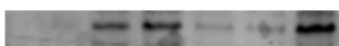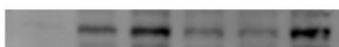

NLRP3

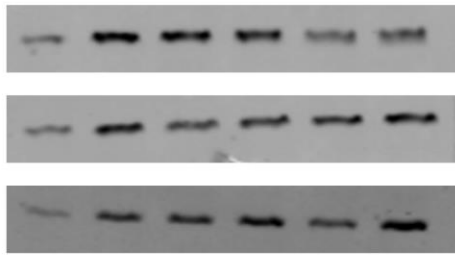

COX2

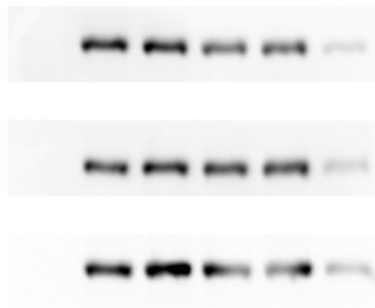

$\beta$ -actin

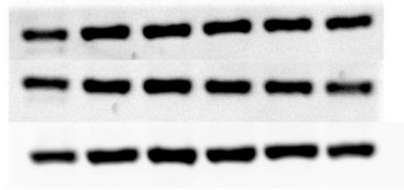

Supplement: d4qo02057j1.pdf [file d4qo02057j1.pdf]
